# Supplementary material for: Hyperbranched PEG-based supramolecular nanoparticles for acid-responsive targeted drug delivery
Source: Royal Society of Chemistry journal article supplement (doi:10.1039/c5bm00061k), 2015-01-01
Supplement: c5bm00061k1.pdf [file c5bm00061k1.pdf]

## Supporting Information

### Hyperbranched PEG-based Supramolecular Nanoparticles for Acid-Responsive Targeted Drug Delivery†

Xiaofei Chen,<sup>a</sup> Xuemei Yao,<sup>a</sup> Chunran Wang,<sup>a</sup> Li Chen,<sup>\*a</sup> and Xuesi Chen<sup>b</sup>

<sup>a</sup>Department of Chemistry, Northeast Normal University, Changchun 130024, P. R. China. E-mail: chenl686@nenu.edu.cn; Fax: +86 431 85099667; Tel: +86 43185099667

<sup>b</sup>Changchun Institute of Applied Chemistry, Chinese Academy of Sciences, Changchun 130022, P. R. China.

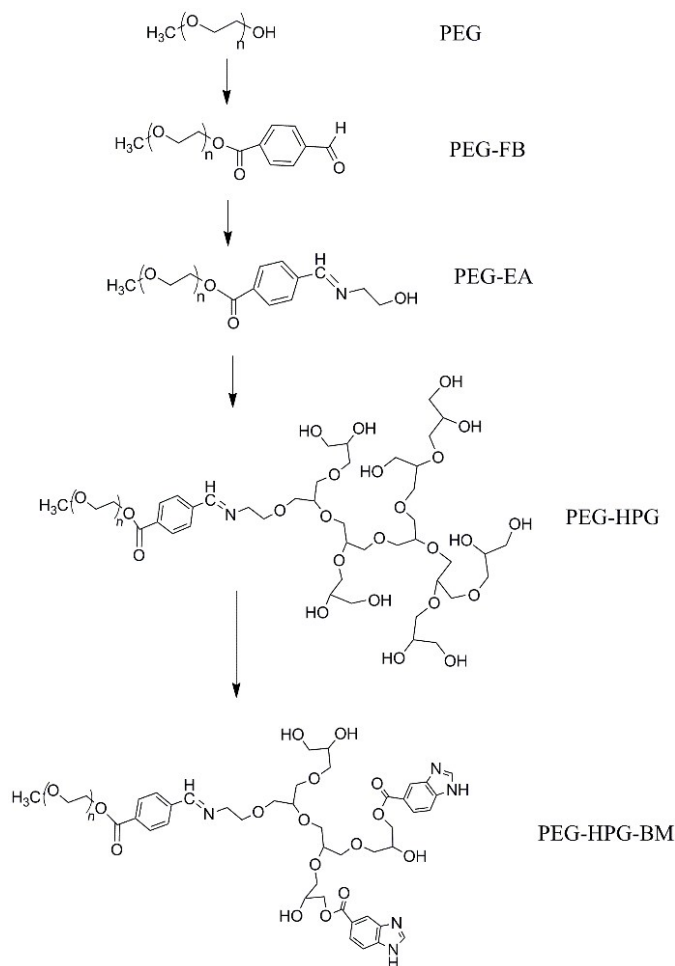

**Fig. S1** synthesis procedure of PEG-HPG-BM

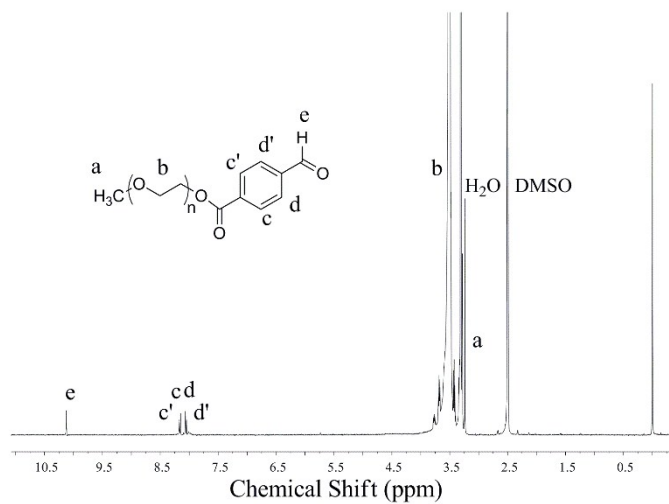

**Fig. S2**  $^1\text{H}$  NMR spectrum of PEG-FB in  $\text{DMSO-}d_6$

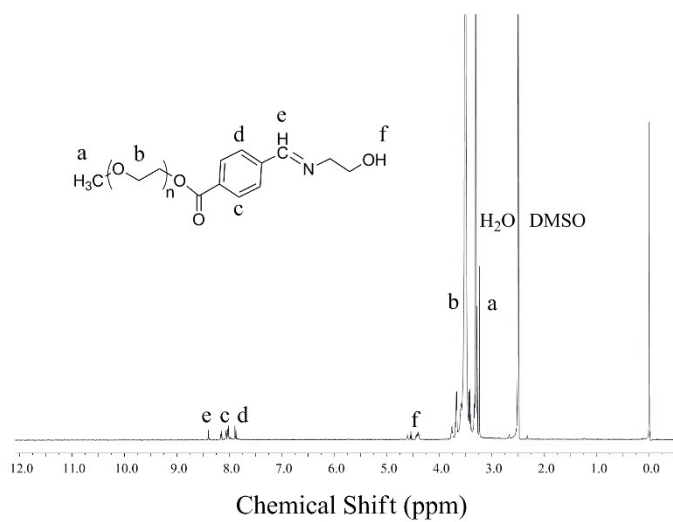

**Fig. S3**  $^1\text{H}$  NMR spectrum of PEG-EA in  $\text{DMSO-}d_6$

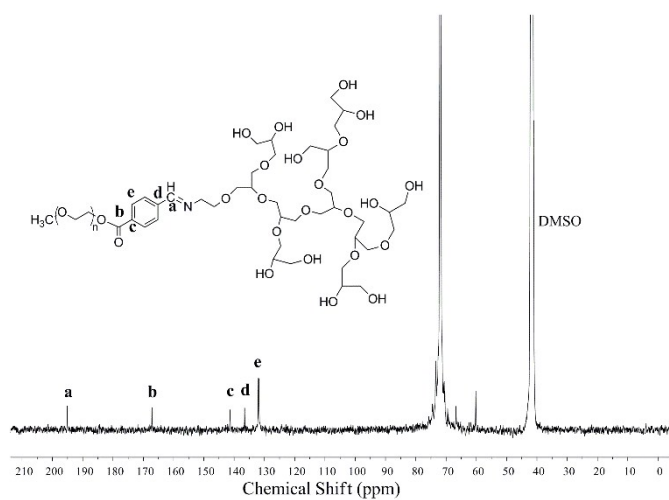

**Fig. S4**  $^{13}\text{C}$  NMR spectrum of PEG-HPG in  $\text{DMSO-}d_6$

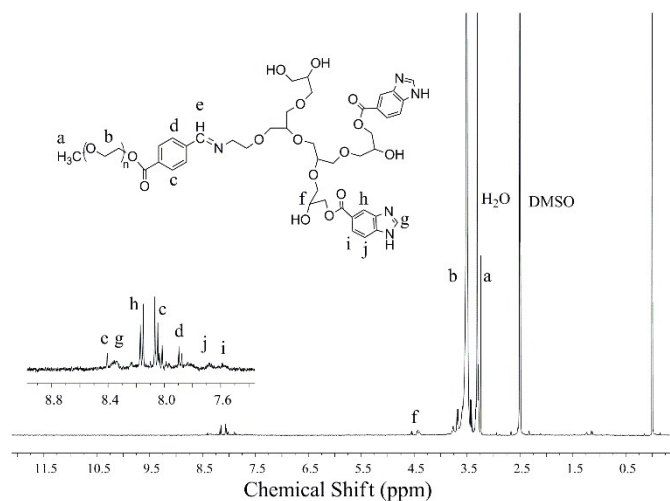

**Fig. S5**  $^1\text{H}$  NMR spectrum of PEG-HPG-BM in  $\text{DMSO-}d_6$

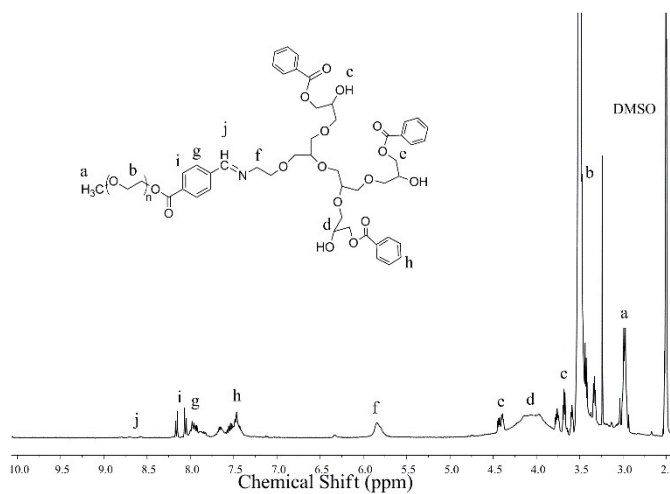

**Fig. S6**  $^1\text{H}$  NMR spectrum of PEG-HPG-BA in  $\text{DMSO-}d_6$

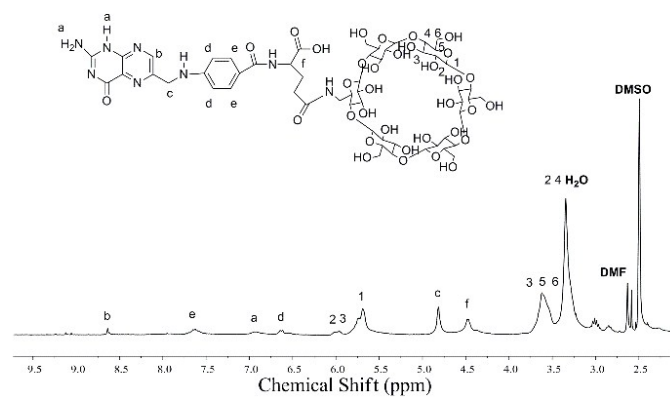

**Fig. S7**  $^1\text{H}$  NMR spectrum of FA-CD in  $\text{DMSO-}d_6$

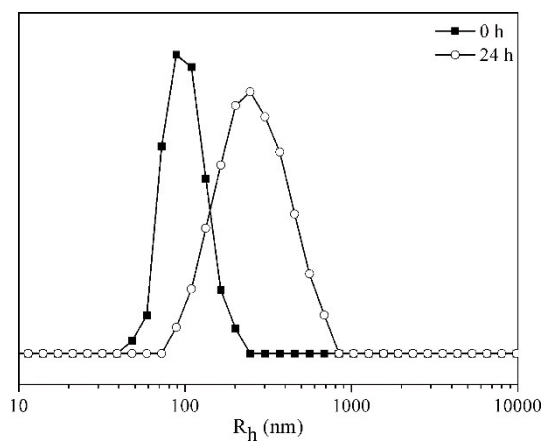

**Fig. S8** DLS of TSNs at pH 5.3 in PBS solution.

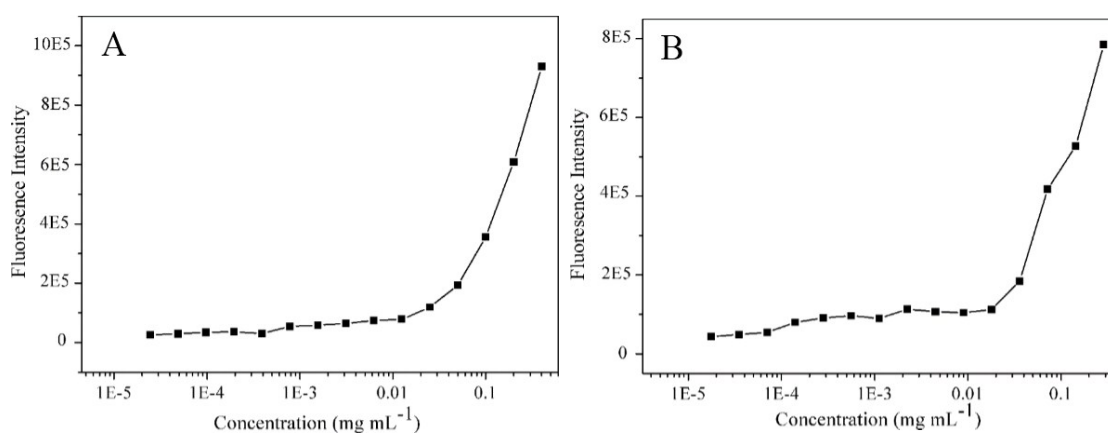

**Fig. S9** CMC values of PEG-HPG-BM (A) and PEG-HPG-BA (B) at pH 7.4 in PBS solution.

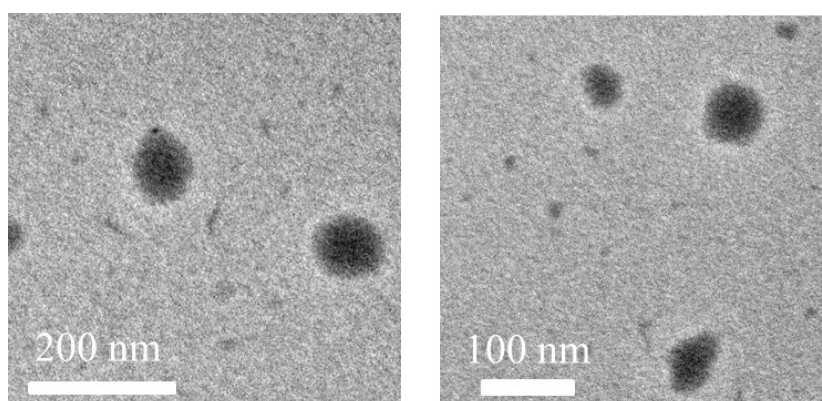

**Fig. S10** TEM of PEG-HPB-BM and PEG-HPB-BA at pH 7.4

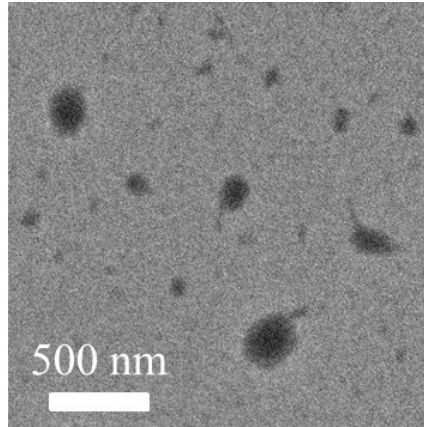

**Fig. S11** TEM of TSNs at pH 5.3.

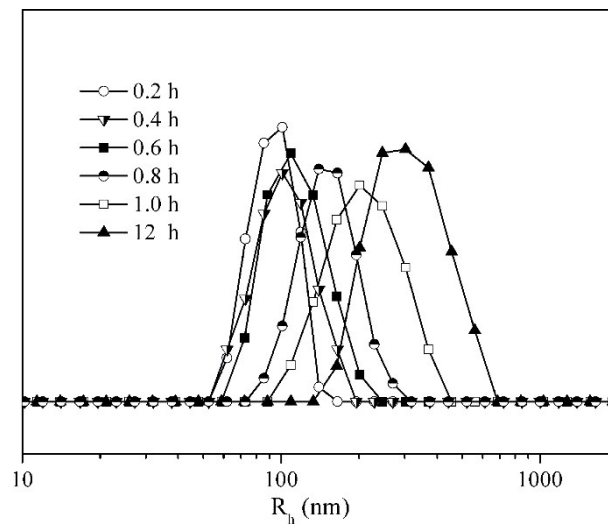

**Fig. S12** Dynamic size changes of TSNs at pH 5.3.

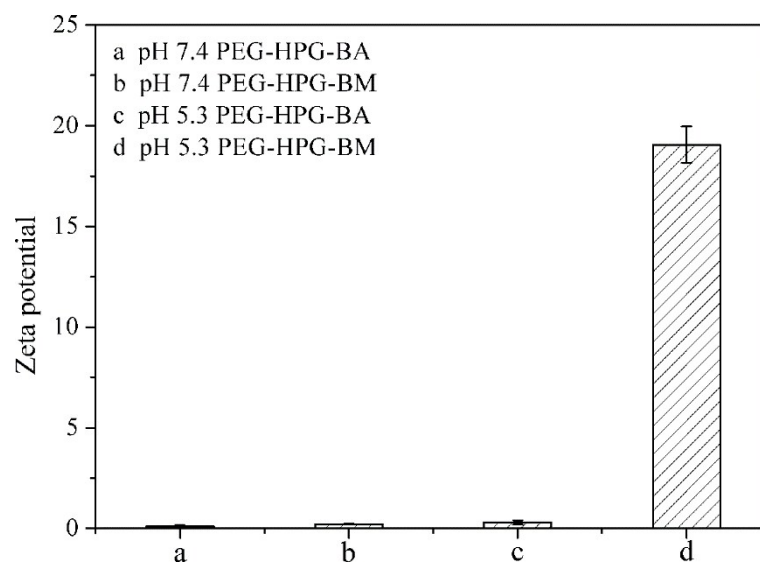

**Fig. S13** Zeta potentials of PEG-HPG-BA and PEG-HPG-BM under pH 5.3 and 7.4 conditions

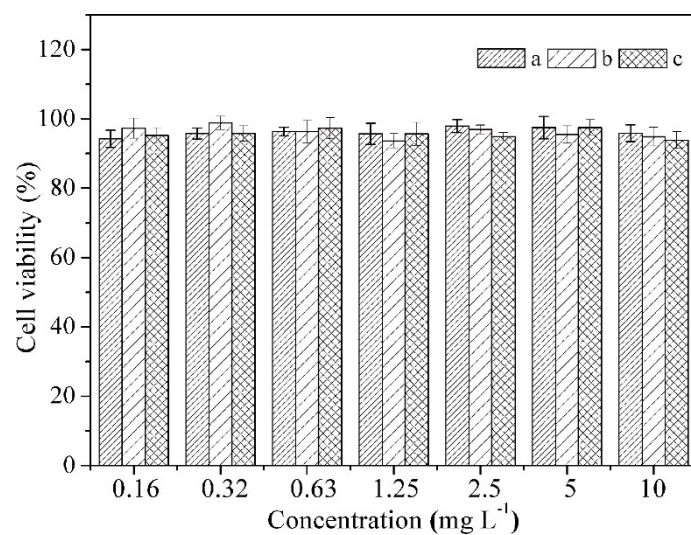

**Fig. S14** Cytotoxicities of PEG-HPG-BM (a), PEG-HPG-BA (b) and TSNs (c) against L929 cells after incubation for 72 h, (n = 3, mean ± SD).

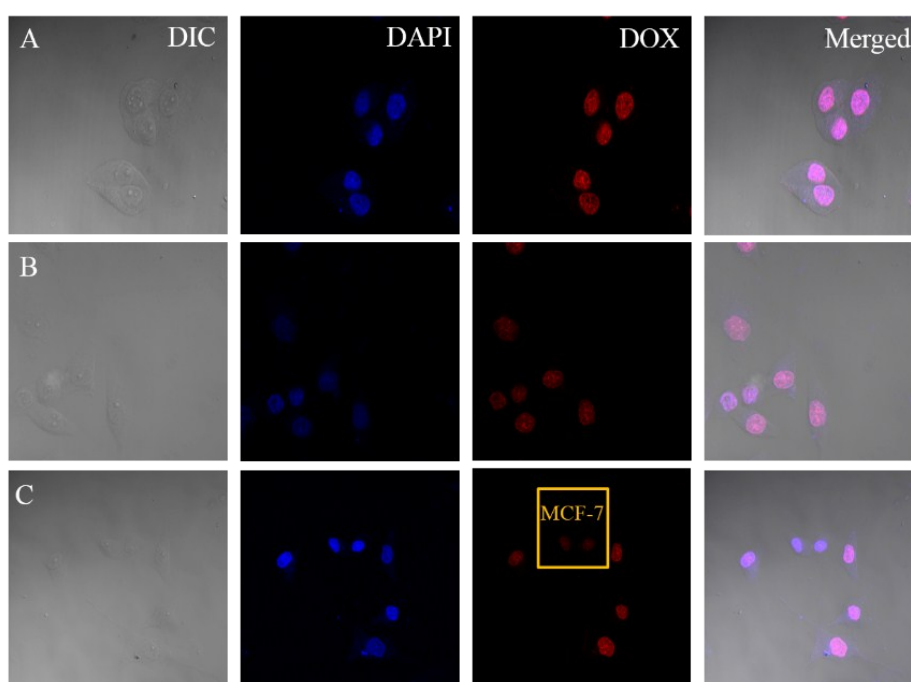

**Fig. S15** Representative CLSM images of HeLa cells (A), MCF-7 cells (B) and co-culture HeLa and MCF-7 cells (C) incubated with DOX-loaded TSNs for 3 h.

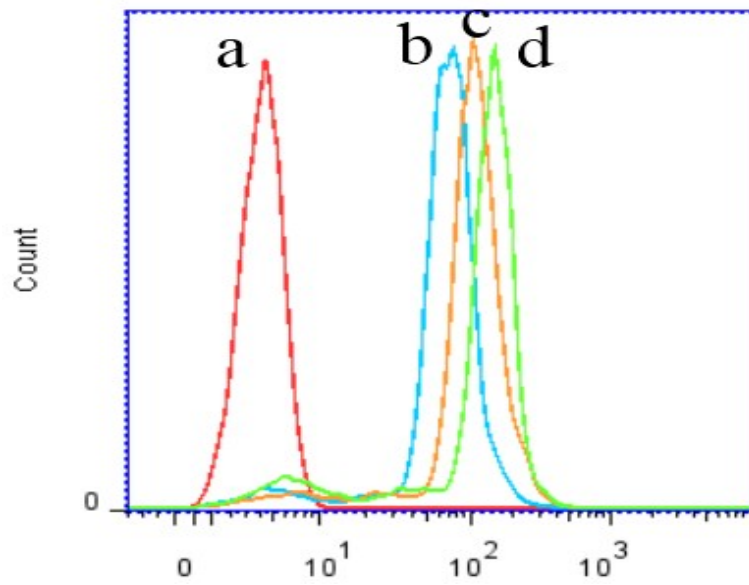

**Fig. S16** Flow cytometric profiles of cells with PBS (a), MCF-7 cells (b), co-culture HeLa and MCF-7 cells (c) and HeLa cells (d) incubated with DOX-loaded TSNs for 3 h.



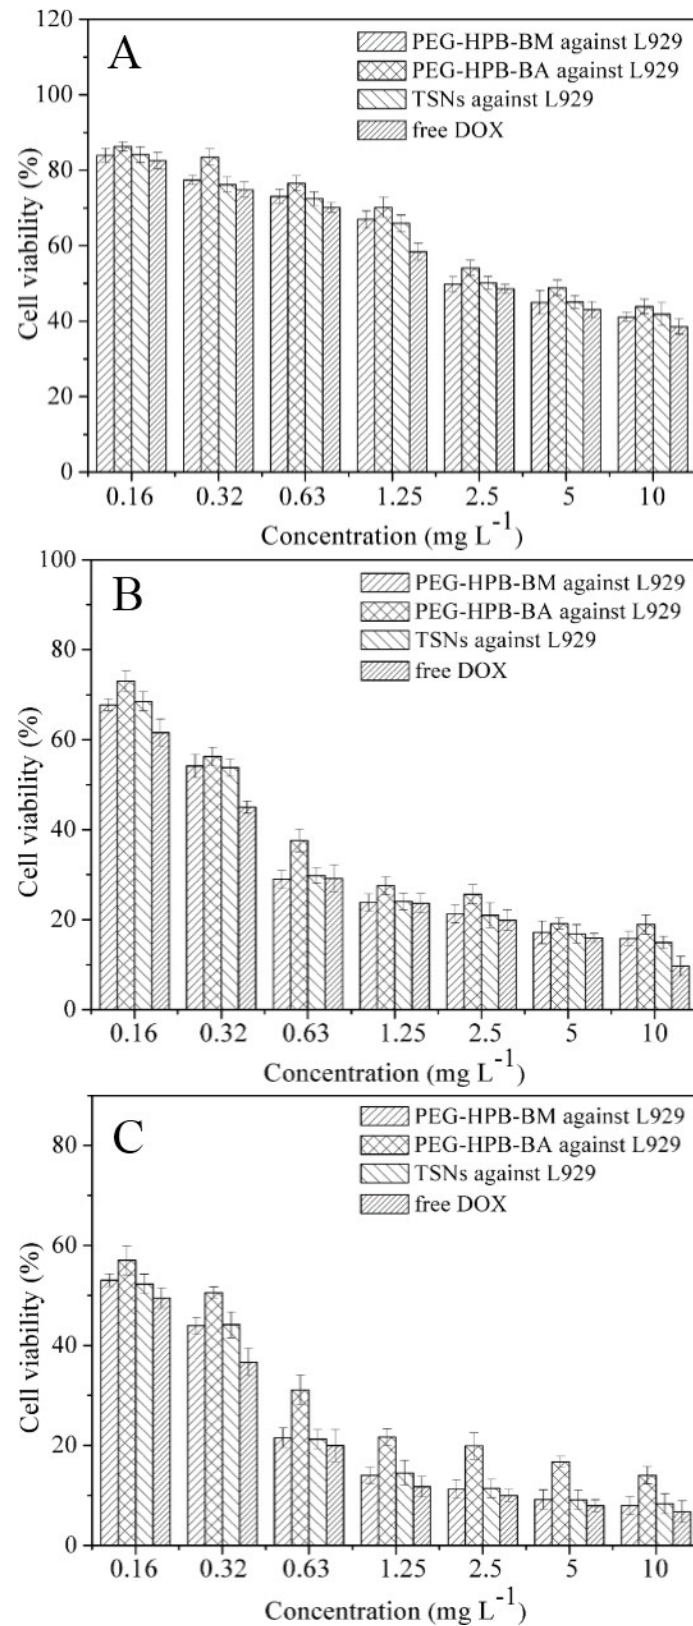

**Fig. S17** Cytotoxicities of DOX-loaded nanoparticles towards L929 cells for 24 h (A), 48 h (B), and 72 h (C), (n = 3, mean ± SD).
